# Supplementary material for: Paper-Based Nanoplatforms for Multifunctional Applications
Source: Hindawi journal article supplement (doi:10.1155/2019/6501923), 2019-04-04
Supplement: f1 [file 6501923.f1.docx]

**Paper-based nanoplatforms for multifunctional applications**

M. L. Matias1, D. Nunes1,*, A. Pimentel1, S. H. Ferreira1, R. Borda d’Agua1,  [M. P. Duarte](http://pubs.rsc.org/en/results?searchtext=Author%3AMaria%20Paula%20Duarte)2, E. Fortunato1 and R. Martins1,*

1*i3N/CENIMAT, Department of Materials Science, Faculty of Sciences and Technology, Universidade NOVA de Lisboa, Campus de Caparica, 2829-516 Caparica, Portugal*

2*MEtRICs, Department of Science and Technology of Biomass, Faculty of Sciences and Technology, Universidade NOVA de Lisboa, Campus de Caparica, 2829-516 Caparica, Portugal*

Figure S1 shows the energy dispersive X-Ray spectroscopy analyses of the pristine papers, *i.e.* Whatman, office and hospital papers. Figure S2 depicts the ZnO and TiO2 nanostructures, as well as the ZnO/TiO2 heterostructure grown on the different paper-based substrates.


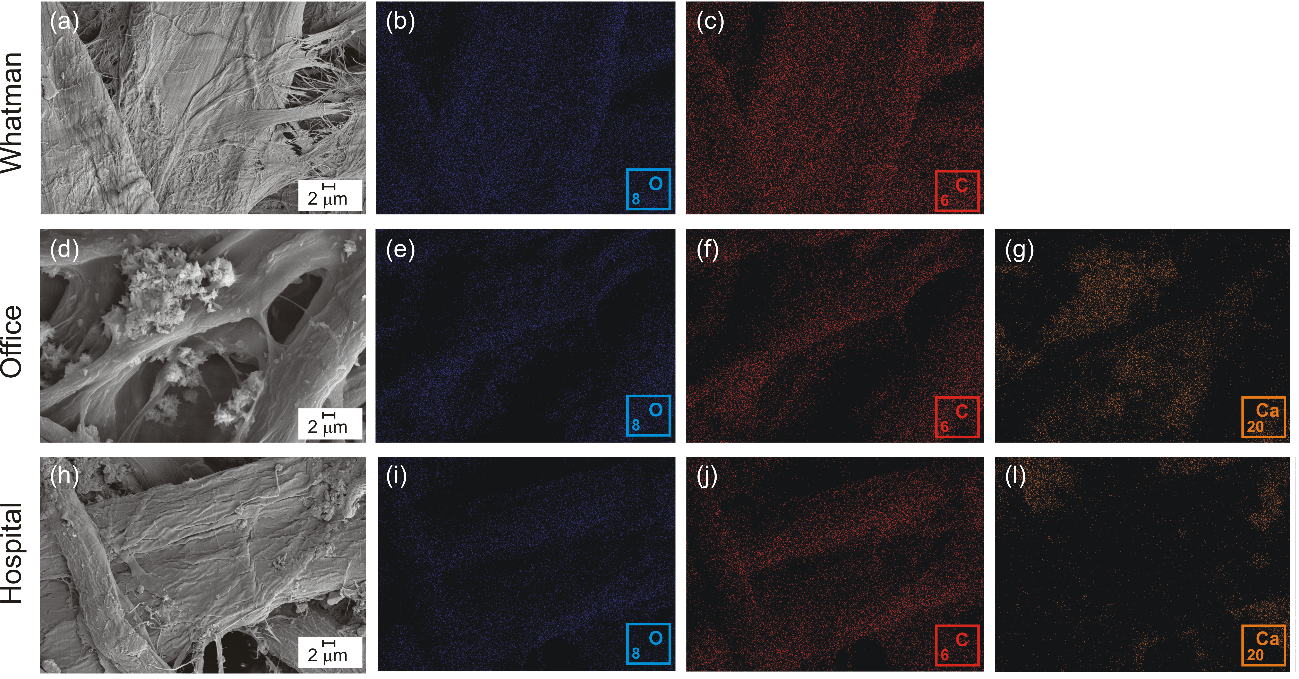


Figure S1 – SEM images of the pristine papers (a) Whatman, (d) office and (h) hospital. The corresponding EDS maps of O (b, e and f), C (c, f and j), Ca (g and l). Minimal amounts of Al and Si were detected on hospital paper, appearing as clusters.


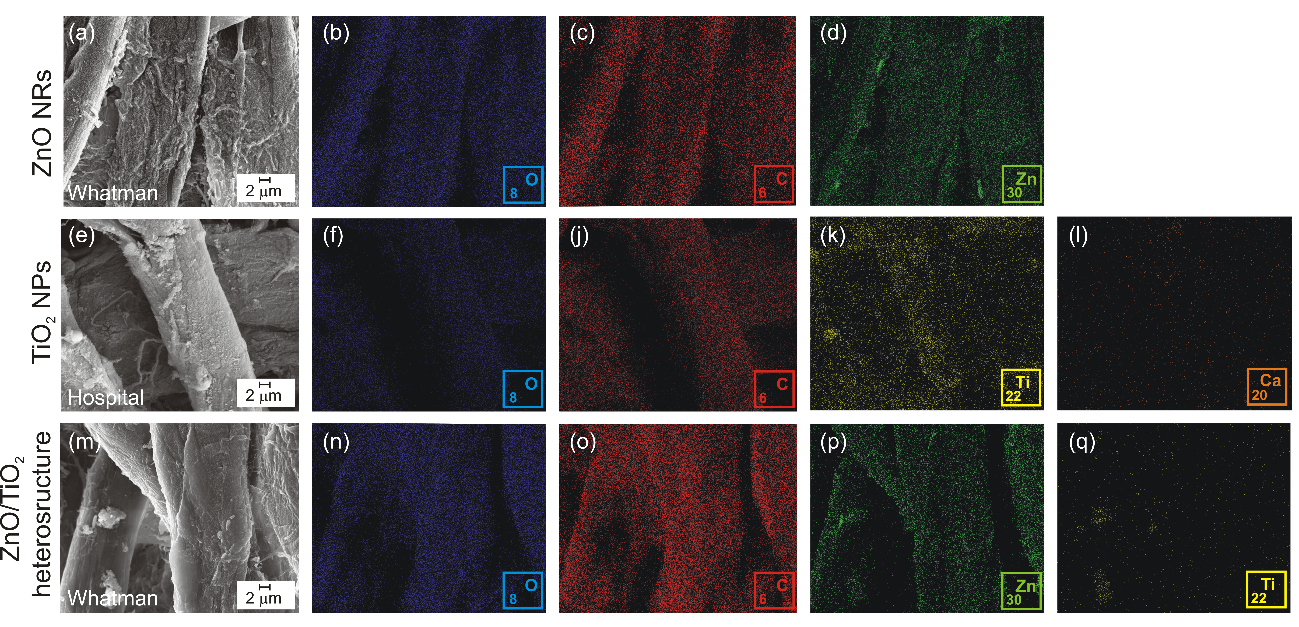


Figure S2 – SEM images of the materials after microwave synthesis (a) ZnO NRs grown on Whatman paper, (e) TiO2 NPs grown on Hospital paper for 15 min (1 M) and (m) ZnO/TiO2 heterostructure (ZnO NRs with TiO2 NPs (25 mM-15 min)) grown on Whatman paper. The corresponding EDS maps of O (b, f and n), C (c, j and o), Ti (k and q), Zn (d and p) and Ca (l). Minimal amounts of Al and Si were detected on hospital paper, appearing as clusters.

Table S1 shows the atomic percentages carried out by EDS point analyses of the pristine papers and the microwave synthesized materials.

Table S1 – EDS measurements (at.%) of the pristine papers (Whatman, office and hospital), as well as the ZnO nanostructures grown on Whatman paper, TiO2 grown on hospital paper for 15 min (1 M) and the ZnO/TiO2 heterostructure (25 mM-15 min)) grown on Whatman paper.

|  |  | Whatman paper | Office paper | Hospital paper | ZnO NRs | TiO2 NPs | ZnO/ TiO2 heterostructure |
| --- | --- | --- | --- | --- | --- | --- | --- |
| Atomic percentage (%) | C | 51.76 | 42.53 | 48.11 | 53.89 | 51.18 | 51.47 |
| O | 48.24 | 53.21 | 48.72 | 44.83 | 48.15 | 47.79 |
| Ca | - | 4.26 | 2.88 | - | 0.03 | - |
| Al | - | - | 0.11 | - | 0.13 | - |
| Si | - | - | 0.18 | - | 0.17 | - |
| Ti | - | - | - | - | 0.33 | 0.39 |
| Zn | - | - | - | 1.28 | - | 0.35 |

Figure S3 shows the Raman spectroscopy measurements of the ZnO and TiO2 nanostructures grown on Whatman paper and the paper spectrum itself. The intense peaks coming from the substrate obscured the ZnO and TiO2 signals.





Figure S3 – Raman spectra of the ZnO and TiO2 nanostructures grown on Whatman paper under microwave irradiation. The pristine Whatman paper is also presented.

Figure S4 shows the XRD measurements of the TiO2 powder formed during the ZnO/TiO2 heterostructure microwave synthesis. The TiO2 synthesis was carried out without any acid.


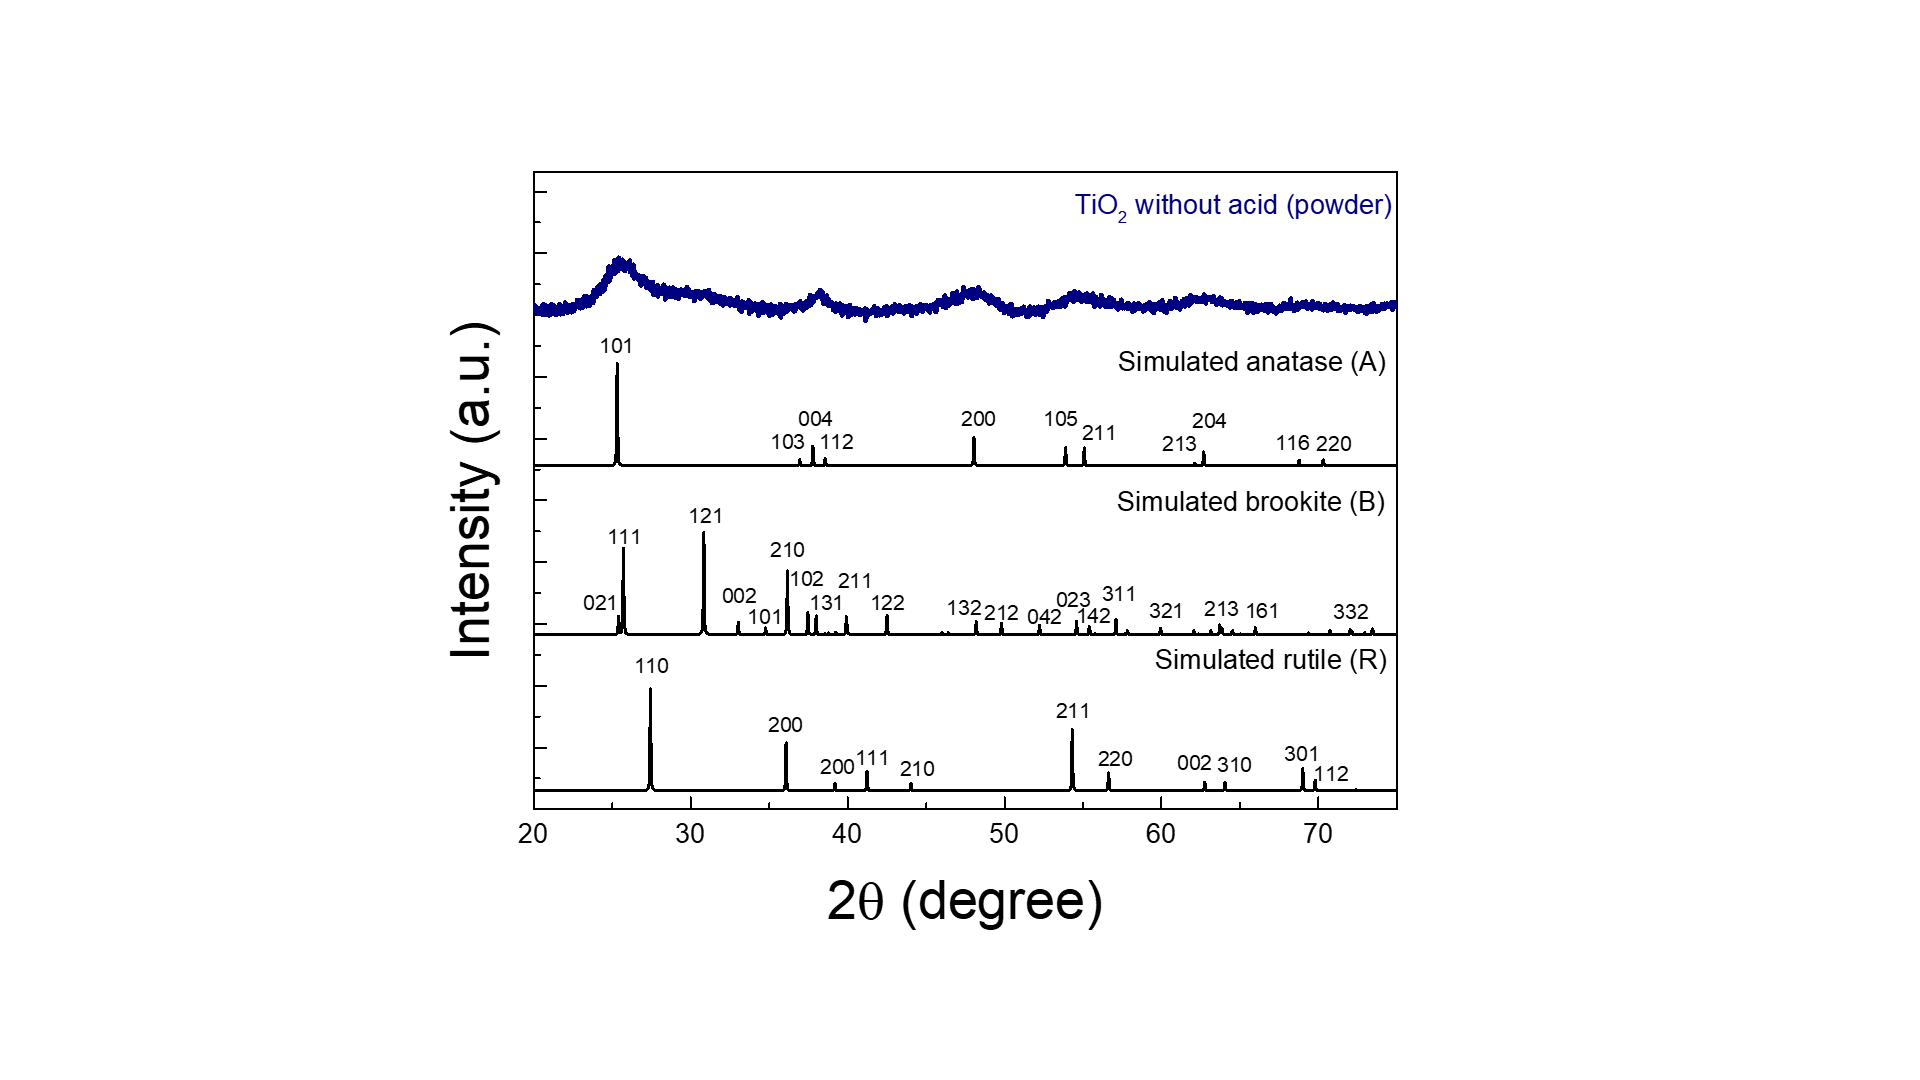


Figure S4 – XRD measurements of the TiO2 powder synthesized without the use of any acid during synthesis.
